# Supplementary material
Source: MDPI journal article supplement (https://www.mdpi.com/2073-4344/13/4/709)
Supplement: s1 [file s1]

**Table S1.** The content of phosphorus of P modified supports.

| Supports                                      | Synthesis Method               | The Load of P (wt.%) |
|-----------------------------------------------|--------------------------------|----------------------|
| 0P $\theta$ -Al <sub>2</sub> O <sub>3</sub>   | -                              | 0                    |
| 0.1P $\theta$ -Al <sub>2</sub> O <sub>3</sub> | incipient wetness impregnation | 0.11                 |
| 0.3P $\theta$ -Al <sub>2</sub> O <sub>3</sub> |                                | 0.31                 |
| 0.6P $\theta$ -Al <sub>2</sub> O <sub>3</sub> |                                | 0.6                  |
| 1P $\theta$ -Al <sub>2</sub> O <sub>3</sub>   |                                | 1.02                 |
| 1.5P $\theta$ -Al <sub>2</sub> O <sub>3</sub> |                                | 1.43                 |
| 3P $\theta$ -Al <sub>2</sub> O <sub>3</sub>   |                                | 2.67                 |

**Table S2.** The specific surface area and pore volume of the supports.

| Supports                                      | S <sub>BET</sub><br>(m <sup>2</sup> ·g <sup>-1</sup> ) | Percentage of Decline<br>Relative to $\theta$ -Al <sub>2</sub> O <sub>3</sub> | Volume<br>(cm <sup>3</sup> ·g <sup>-1</sup> ) | Percentage of Decline<br>Relative to $\theta$ -Al <sub>2</sub> O <sub>3</sub> |
|-----------------------------------------------|--------------------------------------------------------|-------------------------------------------------------------------------------|-----------------------------------------------|-------------------------------------------------------------------------------|
| 0P $\theta$ -Al <sub>2</sub> O <sub>3</sub>   | 111.44                                                 | 0.0                                                                           | 0.442                                         | 0.0                                                                           |
| 0.1P $\theta$ -Al <sub>2</sub> O <sub>3</sub> | 111.08                                                 | 0.3                                                                           | 0.438                                         | 1.0                                                                           |
| 0.3P $\theta$ -Al <sub>2</sub> O <sub>3</sub> | 105.74                                                 | 4.3                                                                           | 0.424                                         | 4.3                                                                           |
| 0.6P $\theta$ -Al <sub>2</sub> O <sub>3</sub> | 103.93                                                 | 6.7                                                                           | 0.413                                         | 6.6                                                                           |
| 1P $\theta$ -Al <sub>2</sub> O <sub>3</sub>   | 103.49                                                 | 7.1                                                                           | 0.413                                         | 6.6                                                                           |
| 1.5P $\theta$ -Al <sub>2</sub> O <sub>3</sub> | 102.63                                                 | 7.9                                                                           | 0.395                                         | 10.6                                                                          |
| 3P $\theta$ -Al <sub>2</sub> O <sub>3</sub>   | 100.41                                                 | 9.9                                                                           | 0.371                                         | 16.1                                                                          |

**Table S3.** Quantitative results of TGA test of supports.

| Supports                             | The Amount of Desorbed Water (mmol·g <sup>-1</sup> ) |
|--------------------------------------|------------------------------------------------------|
| 0Pθ-Al <sub>2</sub> O <sub>3</sub>   | 1.49                                                 |
| 0.1Pθ-Al <sub>2</sub> O <sub>3</sub> | 1.18                                                 |
| 0.3Pθ-Al <sub>2</sub> O <sub>3</sub> | 1.33                                                 |
| 0.6Pθ-Al <sub>2</sub> O <sub>3</sub> | 1.37                                                 |
| 1Pθ-Al <sub>2</sub> O <sub>3</sub>   | 1.60                                                 |
| 1.5Pθ-Al <sub>2</sub> O <sub>3</sub> | 1.63                                                 |
| 3Pθ-Al <sub>2</sub> O <sub>3</sub>   | 1.87                                                 |

**Table S4.** Quantitative results of NH<sub>3</sub>-TPD test of supports.

| Sample                               | Peak1 Temperature (°C) | Amounts of NH <sub>3</sub> Desorption at Peak1 (μmol·g <sup>-1</sup> ) | Relative Surface Hydroxyl Density <sup>(1)</sup> |
|--------------------------------------|------------------------|------------------------------------------------------------------------|--------------------------------------------------|
| 0Pθ-Al <sub>2</sub> O <sub>3</sub>   | 152                    | 116.28                                                                 | 1.00                                             |
| 0.1Pθ-Al <sub>2</sub> O <sub>3</sub> | 156                    | 91.57                                                                  | 0.79                                             |
| 0.3Pθ-Al <sub>2</sub> O <sub>3</sub> | 158                    | 95.17                                                                  | 0.82                                             |
| 0.6Pθ-Al <sub>2</sub> O <sub>3</sub> | 154                    | 109.16                                                                 | 0.94                                             |
| 1Pθ-Al <sub>2</sub> O <sub>3</sub>   | 155                    | 127.12                                                                 | 1.09                                             |
| 1.5Pθ-Al <sub>2</sub> O <sub>3</sub> | 152                    | 139.77                                                                 | 1.20                                             |
| 3Pθ-Al <sub>2</sub> O <sub>3</sub>   | 154                    | 211.03                                                                 | 1.82                                             |

(1) Relative surface hydroxyl density: the surface hydroxyl density of θ-Al<sub>2</sub>O<sub>3</sub> was set as 1, and the relative values of other samples with respect to θ-Al<sub>2</sub>O<sub>3</sub> were defined as the relative surface hydroxyl density of the support.

**Table S5.** Binding energy of P 2p.

| Supports                                    | P 2p Binding Energy (eV) |
|---------------------------------------------|--------------------------|
| 0.1Pθ-Al <sub>2</sub> O <sub>3</sub>        | —                        |
| 0.3Pθ-Al <sub>2</sub> O <sub>3</sub>        | 133.1                    |
| 0.6Pθ-Al <sub>2</sub> O <sub>3</sub>        | 133.34                   |
| 1Pθ-Al <sub>2</sub> O <sub>3</sub>          | 133.6                    |
| 1.5Pθ-Al <sub>2</sub> O <sub>3</sub>        | 133.8                    |
| 3Pθ-Al <sub>2</sub> O <sub>3</sub>          | 134.0                    |
| PO <sub>4</sub> <sup>3-</sup>               | 130.2                    |
| HPO <sub>4</sub> <sup>2-</sup>              | 133.4                    |
| H <sub>2</sub> PO <sub>4</sub> <sup>-</sup> | 133.8                    |

**Table S6.** Element content of Pd catalysts.

| Samples                                 | Content of P (wt.%) | Content of Pd (wt.%) |
|-----------------------------------------|---------------------|----------------------|
| Pd/0Pθ-Al <sub>2</sub> O <sub>3</sub>   | 0                   | 0.79                 |
| Pd/0.1Pθ-Al <sub>2</sub> O <sub>3</sub> | 0.11                | 0.81                 |
| Pd/0.3Pθ-Al <sub>2</sub> O <sub>3</sub> | 0.31                | 0.80                 |
| Pd/0.6Pθ-Al <sub>2</sub> O <sub>3</sub> | 0.6                 | 0.82                 |
| Pd/1Pθ-Al <sub>2</sub> O <sub>3</sub>   | 1.02                | 0.78                 |
| Pd/1.5Pθ-Al <sub>2</sub> O <sub>3</sub> | 1.43                | 0.81                 |
| Pd/3Pθ-Al <sub>2</sub> O <sub>3</sub>   | 2.67                | 0.82                 |

**Table S7.** Quantitative results of TGA test of samples.

| Samples                                 | The Amount of Desorbed Water (mmol/g) |
|-----------------------------------------|---------------------------------------|
| Pd/0Pθ-Al <sub>2</sub> O <sub>3</sub>   | 1.69                                  |
| Pd/0.1Pθ-Al <sub>2</sub> O <sub>3</sub> | 0.95                                  |
| Pd/0.3Pθ-Al <sub>2</sub> O <sub>3</sub> | 1.33                                  |
| Pd/0.6Pθ-Al <sub>2</sub> O <sub>3</sub> | 1.59                                  |
| Pd/1Pθ-Al <sub>2</sub> O <sub>3</sub>   | 1.80                                  |
| Pd/1.5Pθ-Al <sub>2</sub> O <sub>3</sub> | 1.92                                  |
| Pd/3Pθ-Al <sub>2</sub> O <sub>3</sub>   | 2.05                                  |

**Table S8.** Quantitative results of NH<sub>3</sub>-TPD test of samples.

| Samples                                 | Peak1 Temperature (°C) | The Desorption of NH <sub>3</sub> at Peak 1 (umol/g) | Relative Surface Hydroxyl Density |
|-----------------------------------------|------------------------|------------------------------------------------------|-----------------------------------|
| Pd/0Pθ-Al <sub>2</sub> O <sub>3</sub>   | 154                    | 120.67                                               | 1.000                             |
| Pd/0.1Pθ-Al <sub>2</sub> O <sub>3</sub> | 160                    | 78.13                                                | 0.647                             |
| Pd/0.3Pθ-Al <sub>2</sub> O <sub>3</sub> | 156                    | 97.95                                                | 0.812                             |
| Pd/0.6Pθ-Al <sub>2</sub> O <sub>3</sub> | 151                    | 110.29                                               | 0.914                             |
| Pd/1Pθ-Al <sub>2</sub> O <sub>3</sub>   | 148                    | 124.31                                               | 1.030                             |
| Pd/1.5Pθ-Al <sub>2</sub> O <sub>3</sub> | 148                    | 136.45                                               | 1.131                             |
| Pd/3Pθ-Al <sub>2</sub> O <sub>3</sub>   | 148                    | 198.10                                               | 1.642                             |

**Table S9.** Apparent activation energy of samples in the presence 8% water.

| Samples                                 | Apparent Activation Energy (kJ·mol <sup>-1</sup> ) |
|-----------------------------------------|----------------------------------------------------|
| Pd/0Pθ-Al <sub>2</sub> O <sub>3</sub>   | 172.81                                             |
| Pd/0.1Pθ-Al <sub>2</sub> O <sub>3</sub> | 170.24                                             |
| Pd/0.3Pθ-Al <sub>2</sub> O <sub>3</sub> | 171.14                                             |
| Pd/0.6Pθ-Al <sub>2</sub> O <sub>3</sub> | 170.41                                             |
| Pd/1Pθ-Al <sub>2</sub> O <sub>3</sub>   | 172.07                                             |
| Pd/1.5Pθ-Al <sub>2</sub> O <sub>3</sub> | 172.05                                             |
| Pd/3Pθ-Al <sub>2</sub> O <sub>3</sub>   | 177.60                                             |

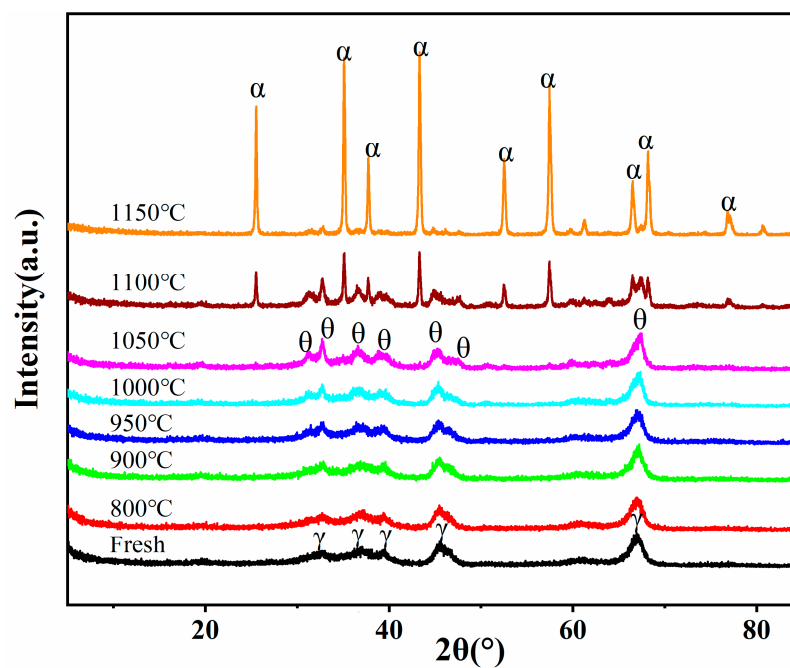

Figure S1. XRD patterns of the commercial  $\gamma$ - $\text{Al}_2\text{O}_3$  calcined at different temperature.

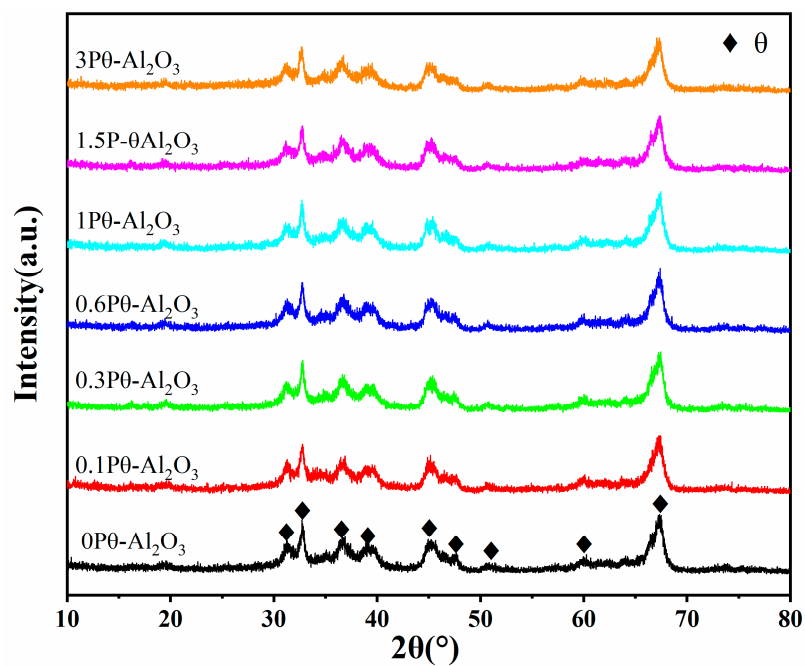

Figure S2. XRD patterns of the xP $\theta$ - $\text{Al}_2\text{O}_3$  supports.

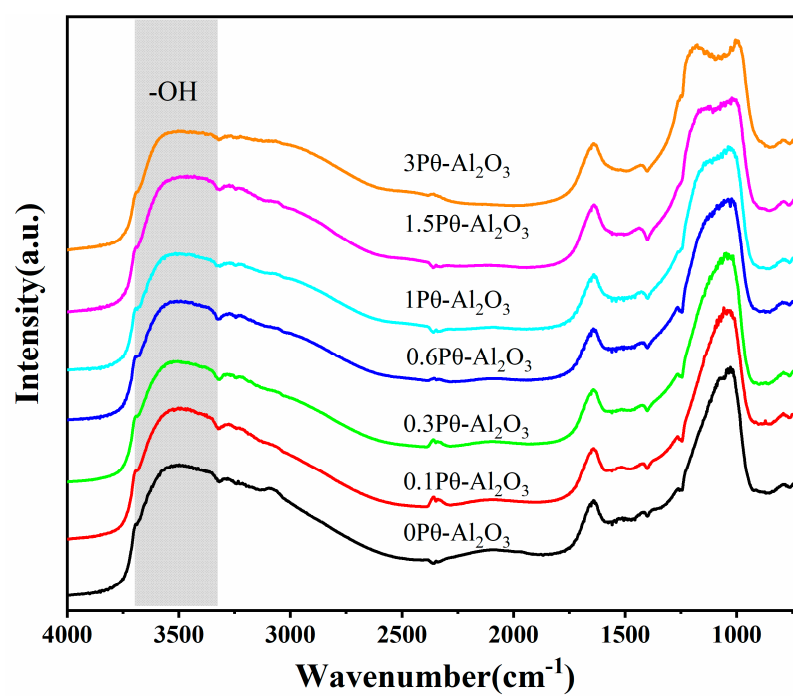

Figure S3. FT-IR profiles of supports.

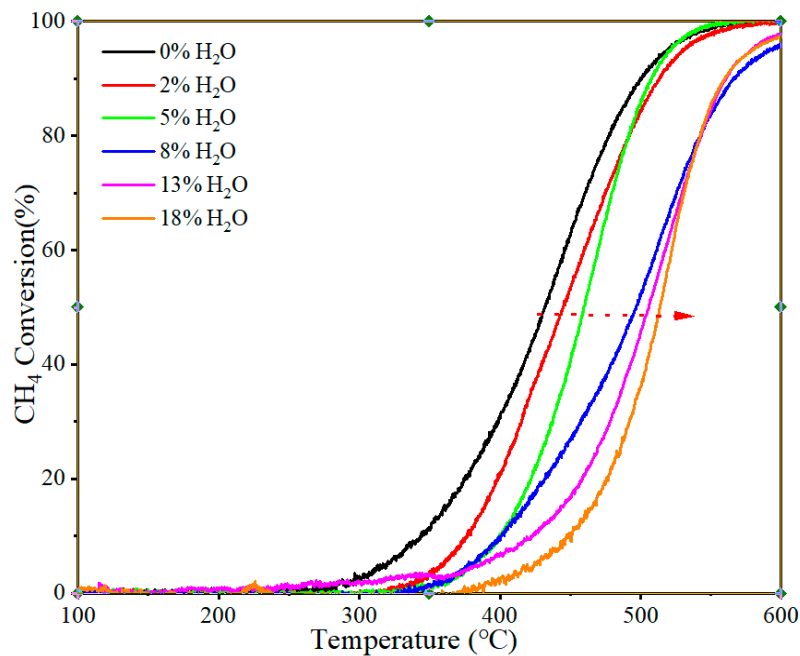

Figure S4. Catalytic combustion of methane over Pd/ $\gamma$ -Al<sub>2</sub>O<sub>3</sub> with different amounts of water. Conditions: 2000ppmCH<sub>4</sub>, 5 vol.% O<sub>2</sub>, 0–18 vol.%H<sub>2</sub>O, N<sub>2</sub> balance; GHSV=36,000 h<sup>-1</sup>.

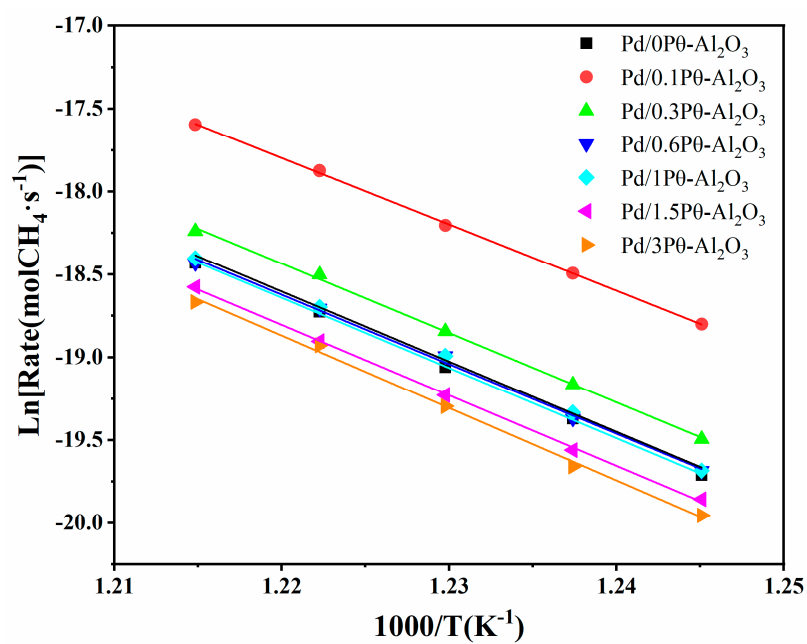

**Figure S5.** The Arrhenius curve of the samples in the presence of 8% water. (Conditions: 2000ppm CH<sub>4</sub>, 5%O<sub>2</sub>, 8%H<sub>2</sub>O and N<sub>2</sub> as balance gas, GHSV=180,000h<sup>-1</sup>).
